# Supplementary material for: Alleviation Effects of Microbial Metabolites from Resveratrol on Non-Alcoholic Fatty Liver Disease
Source: MDPI journal article supplement (doi:10.3390/foods12010094), 2022-12-24

Supplemental Figure legends

Supplementary Table S1. The amplification efficiency of primers.

| Gene           | amplification efficiency (%) |
|----------------|------------------------------|
| <i>cd36</i>    | 94.31                        |
| <i>fabp1</i>   | 92.18                        |
| <i>slc27a5</i> | 103.67                       |
| <i>cpt1a</i>   | 108.26                       |
| <i>acadm</i>   | 107.75                       |
| <i>pdk4</i>    | 98.33                        |
| <i>pparg</i>   | 95.91                        |
| <i>abca1</i>   | 105.36                       |
| <i>abcg5</i>   | 96.49                        |
| <i>abcg8</i>   | 93.15                        |
| <i>ldlr</i>    | 93.78                        |
| <i>scarb1</i>  | 103.42                       |
| <i>gapdh</i>   | 105.59                       |

Supplementary Table S2. The chemical composition of diets

| Ingredient                            | Normal diet (ND) |       | High-fat diet (HFD) |       |
|---------------------------------------|------------------|-------|---------------------|-------|
|                                       | g%               | kcal% | g%                  | kcal% |
| Casein, 30 Mesh                       | 18.96            | 19.72 | 25.84               | 19.72 |
| L-Cystine                             | 0.28             | 0.30  | 0.39                | 0.30  |
| Corn Starch                           | 47.98            | 49.91 | 0.00                | 0.00  |
| Maltodextrin 10                       | 11.85            | 12.32 | 16.15               | 12.32 |
| Sucrose                               | 6.52             | 6.78  | 8.89                | 6.78  |
| Cellulose, BW200                      | 4.74             | 0.00  | 6.46                | 0.00  |
| Soybean Oil                           | 2.37             | 5.55  | 3.23                | 5.55  |
| Lard*                                 | 1.90             | 4.44  | 31.66               | 54.35 |
| Mineral Mix S10026                    | 0.95             | 0.00  | 1.29                | 0.00  |
| DiCalcium Phosphate                   | 1.23             | 0.00  | 1.68                | 0.00  |
| Calcium Carbonate                     | 0.52             | 0.00  | 0.71                | 0.00  |
| Potassium Citrate, 1 H <sub>2</sub> O | 1.56             | 0.00  | 2.13                | 0.00  |
| Vitamin Mix V10001                    | 0.95             | 0.99  | 1.29                | 0.99  |
| Choline Bitartrate                    | 0.19             | 0.00  | 0.26                | 0.00  |
| FD&C Yellow Dye                       | 0.00             | 0.00  | 0.01                | 0.00  |
| Energy (kcal/g diet)                  | 3.85             |       | 5.24                |       |

Supplementary Figure S1. Cytotoxicity assay of RSV and phenolic acids at doses from 0 to 200  $\mu\text{M}$  with and without OA for 24 h. (A) RSV; (B) 3-HBA; (C) 3-HPP; (D) 4-HBA; (E) 4-HPA; (F) 4-HPP.

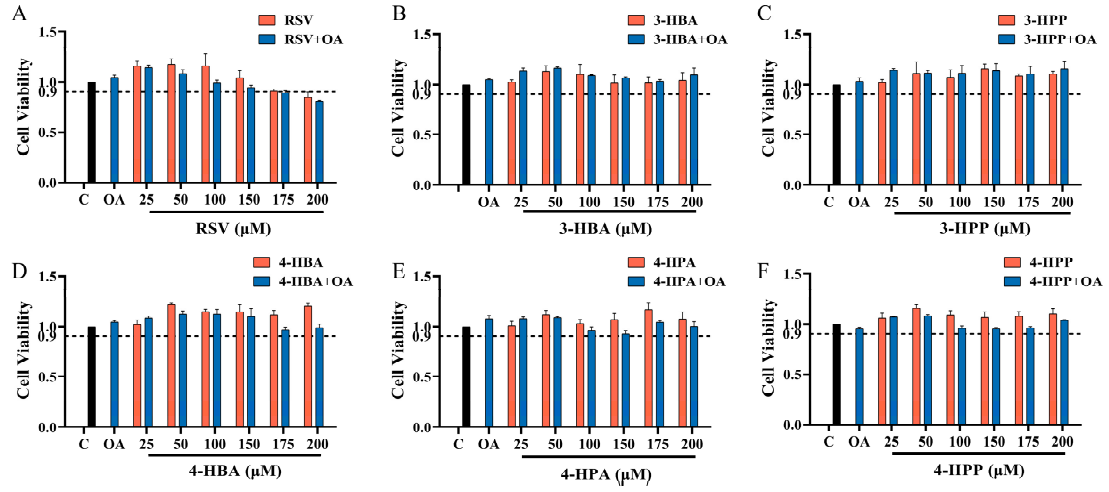

Supplement: s1 [file s1]
